# Supplementary material for: PLGA micro/nanoparticle vaccination elicits non-tumor antigen specific resident memory CD8+ T cell protection from hepatocellular carcinoma
Source: Royal Society of Chemistry journal article supplement (doi:10.1039/d4nr00554f), 2024-01-01
Supplement: d4nr00554f1.pdf [file d4nr00554f1.pdf]

# **PLGA micro/nanoparticles vaccination elicits non-tumor antigen specific resident memory CD8<sup>+</sup> T cells protecting from Hepatocellular Carcinoma.**

**Pan Li<sup>1,2†</sup>, Zihé Zhai<sup>3†</sup>, Jiawen Fang<sup>1†</sup>, Ruó Wang<sup>2</sup>, Weiqi Li<sup>1</sup>, Beiduo Wang<sup>3</sup>, Jinglei Wang<sup>1</sup>, Jiaqi Zhu, Feng Bing<sup>2</sup>, Qiaoling Pan<sup>2</sup>, ChangYou Gao<sup>3\*</sup>, Pan Li<sup>1,2\*</sup> and ShaoHong Lu<sup>1\*</sup>**

**1**, Engineering Research Center of Novel Vaccine of Zhejiang Province, Hangzhou Medical College, Hangzhou, 310051, China.

**2**, State Key Laboratory for the Diagnosis and Treatment of Infectious Diseases, Collaborative Innovation Center for Diagnosis and Treatment of Infectious Diseases, The First Affiliated Hospital, Zhejiang University School of Medicine, 79 Qingchun Rd., Hangzhou City, 310003, China.

**3**, MOE Key Laboratory of Macromolecular Synthesis and Functionalization, Department of Polymer Science and Engineering, Zhejiang University, Hangzhou, 310027, China.

## **Email addresses:**

Pan Li: panli0706@zju.edu.cn

Zihé Zhai: zhaizh@zju.edu.cn

Jiawen Fang: 881012022054@hmc.edu.cn

RuóWang: wangruo1998@zju.edu.cn

Weiqi Li: 17662433651@163.com

Beiduo Wang: bdwang10@zju.edu.cn

Jiaqi Zhu: 11818073@zju.edu.cn

Bing Feng: 21818015@zju.edu.cn

JingLei Wang: 13305470636@163.com

Qiaoling Pan: qiaolingpan@zju.edu.cn

† These authors contributed equally to this work.

\*Correspondence:

ChangYou Gao: cygao@zju.edu.cn

ShaoHong Lu: llsshh2003@163.com.

Pan Li: panli0706@zju.edu.cn

## Supplementary figures: Figure S1-S6

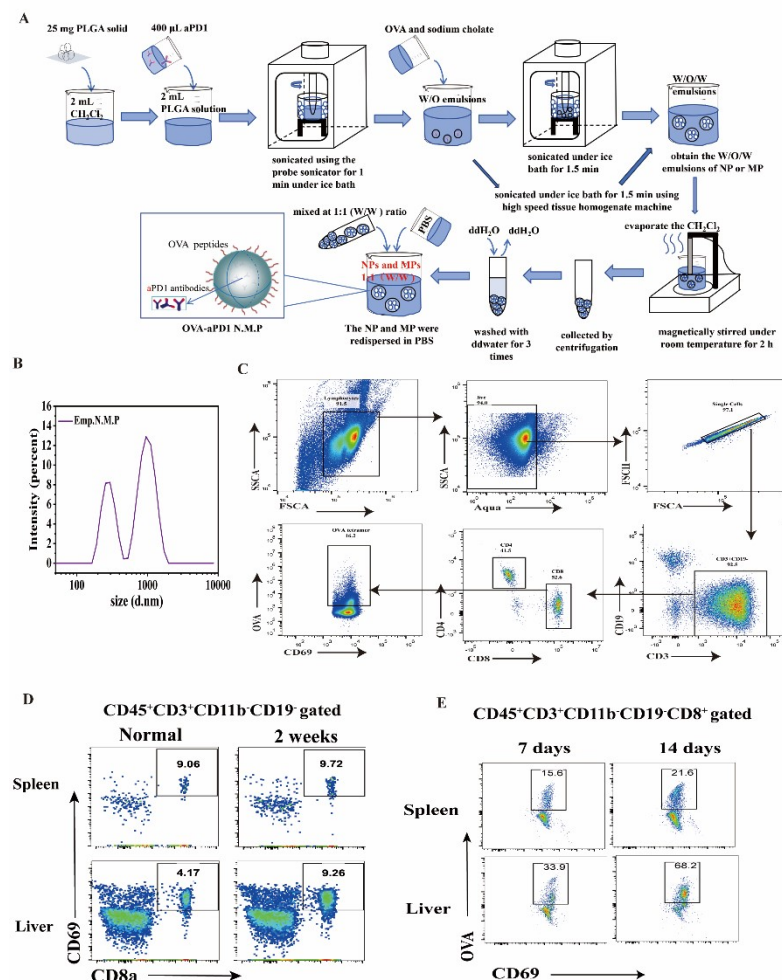

**Figure S1. Characterization of particles and the test of CD8<sup>+</sup>TRM after mouse model established.** (A)Preparation method of OVA-aPD1 N.M.P by double emulsification method. (B)Size distribution Emp.N.M.P. (C) Gating strategy for OVA specific CD8<sup>+</sup>TRMs. (D)Flow cytometry analysis showing the percentage of CD8<sup>+</sup>TRMs in liver and spleen tissues of mouse after tumor modeling 2 weeks. (E)

Flow cytometry analysis showing the percentage of OVA-specific CD8<sup>+</sup>T cells among CD3<sup>+</sup>CD8<sup>+</sup>T cells in liver and spleen tissues isolated from tumor bearing C57BL/6 mice vaccinated after OVA high dose immunization.

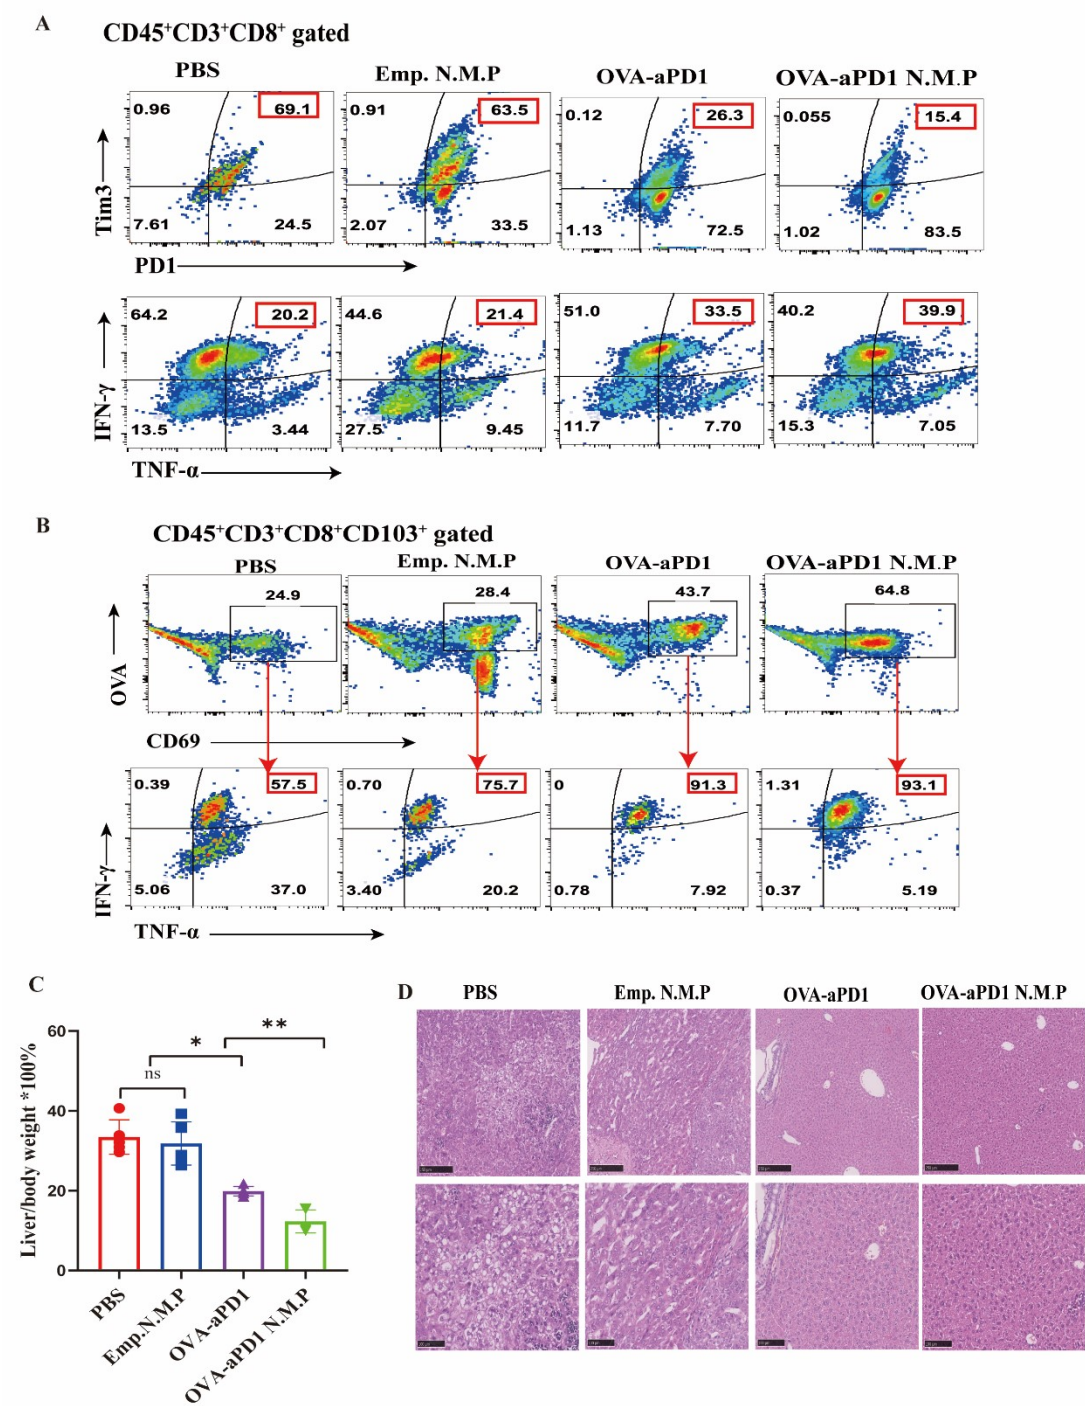

**Figure S2. The immune activity CD8<sup>+</sup>T cells and CD8<sup>+</sup>TRM after vaccine immunization. (A)** The representative flow cytometry plots of intracellular and surface marker staining and gating strategies of Tim3<sup>+</sup>PD-1<sup>+</sup>CD8<sup>+</sup>T cells and TNF- $\alpha$ <sup>+</sup>IFN-

$\gamma^+$ CD8 $^+$ T cells. **(B)** The representative flow cytometry plots of OVA tetramer pool, intracellular and surface staining and gating strategies of OVA specific CD8 $^+$ TRMs and TNF- $\alpha$  $^+$ IFN- $\gamma$  $^+$  OVA specific CD8 $^+$ TRMs. **(C)** The liver-body-weight ratio of different groups, n=5. **(D)** H&E staining was performed to evaluate histopathological changes in livers (images at x100 magnification, scale bar=100 $\mu$ m). Statistical significance was analyzed using two-tailed Student's t-test between two groups, \*p<0.05, \*\*p <0.01, \*\*\*p<0.001.

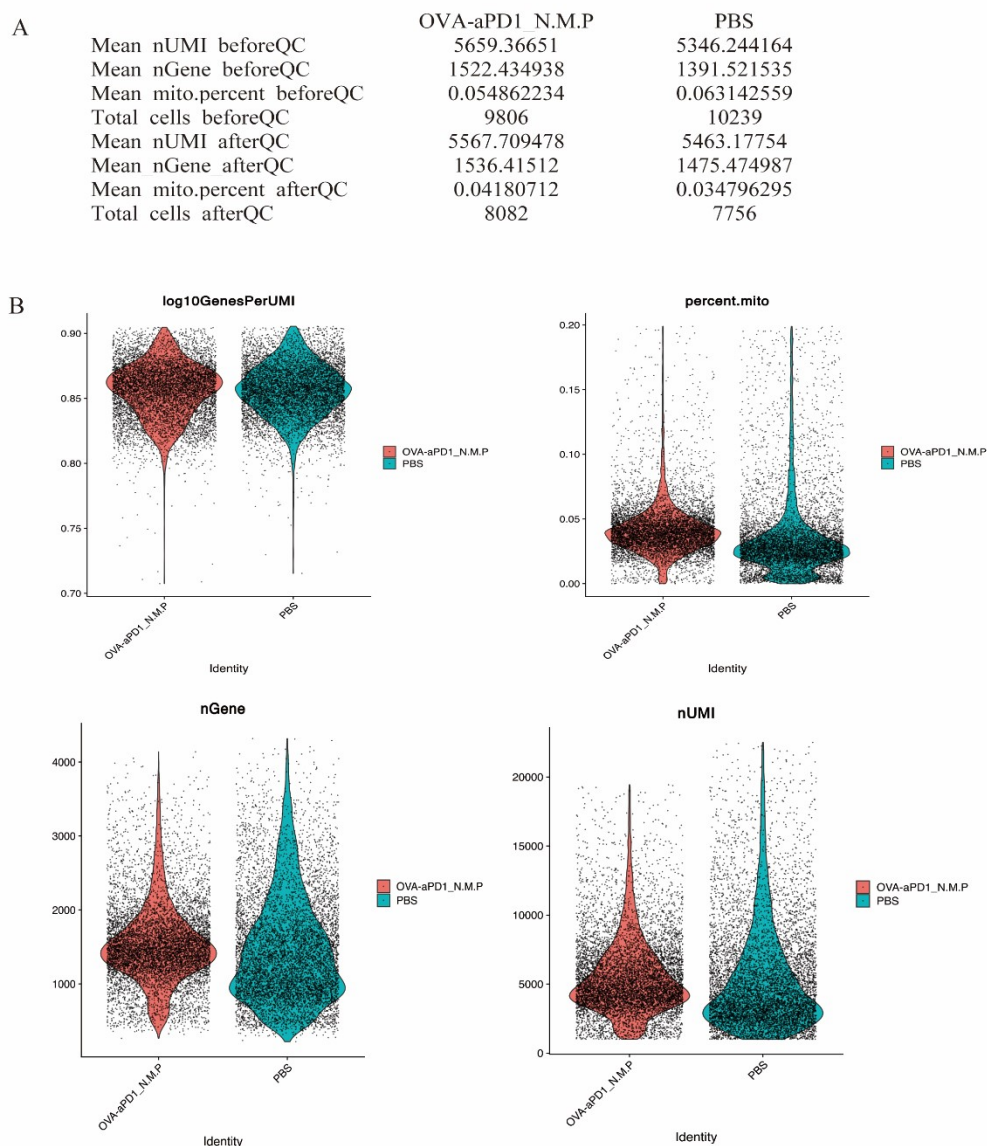

**Figure S3. Quality controls for scRNA-seq of mouse liver immune cells.** **(A)** Sequencing parameters of CD45 $^+$ mouse liver immune cells subjected to 10 $\times$ Genomics scRNA-seq platform. **(B)** Genes number of CD45 $^+$ mouse liver immune cells within each sample.

(C) Mitochondrial genes/all genes (%) in each CD45<sup>+</sup>mouse liver immune cells transcriptomes of each sample. (D) Total genes number identifier counts are shown. (E) Unique molecular identifier number per cell for each sample.

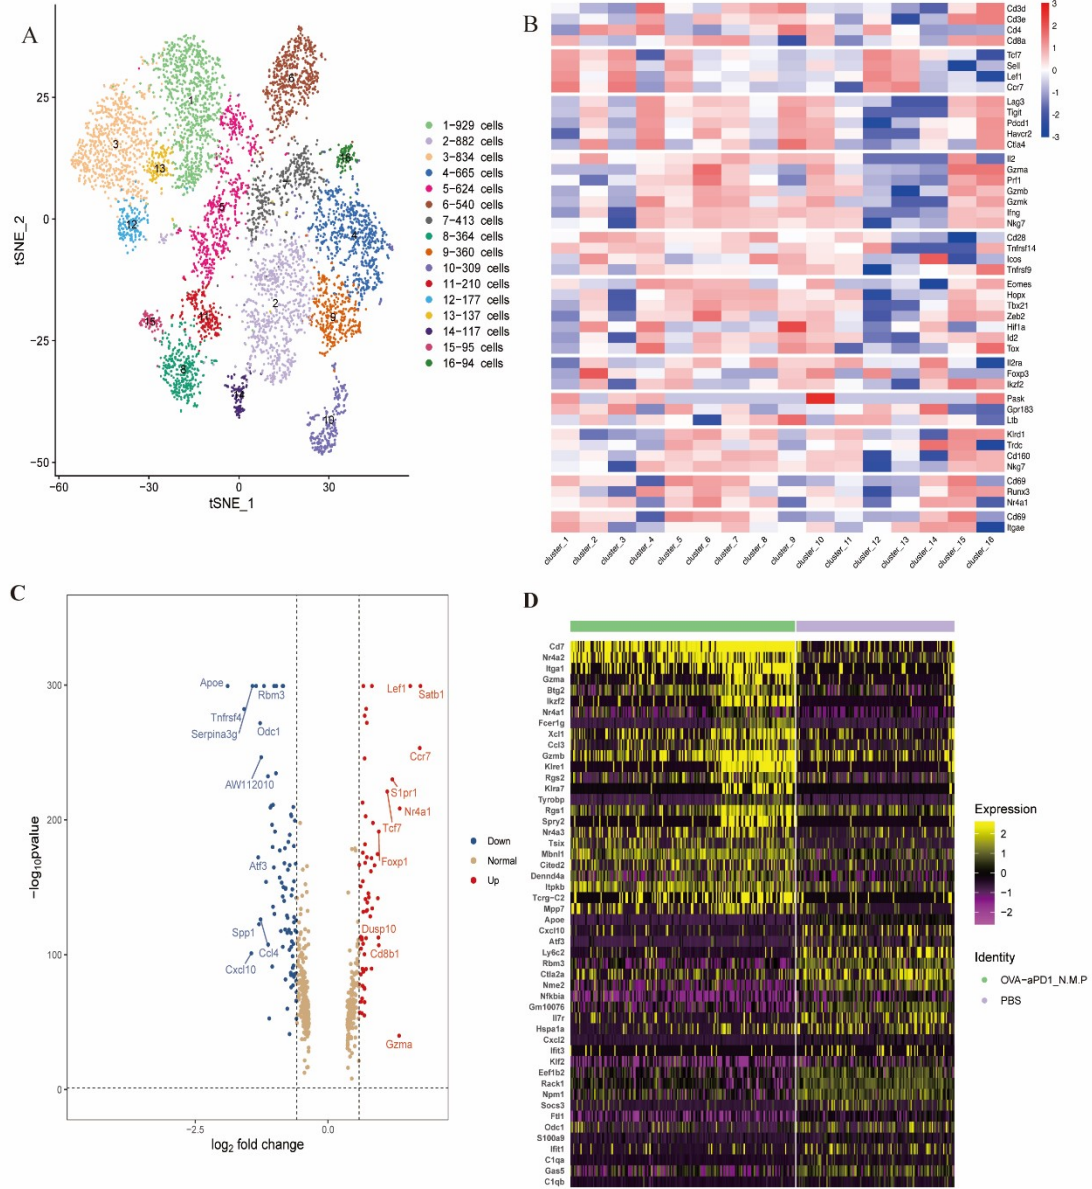

**Figure S4. Liver local immune cell changes with vaccination.** (A) tSNE map showing liver major immune cell subsets. (B) Heatmap showing averaged marker expression level of each cluster. (C) Volcano map of differentially expressed genes of T cells, the red points represent upregulated genes selected based on the corrected p-value<0.05 and logFC>1, the blue points represent downregulated genes selected based on the corrected p-value<0.05 and logFC<-1, the brown points represent genes with no significant difference. (D) Heatmap displayed the highly expressed marker genes for T

cells.

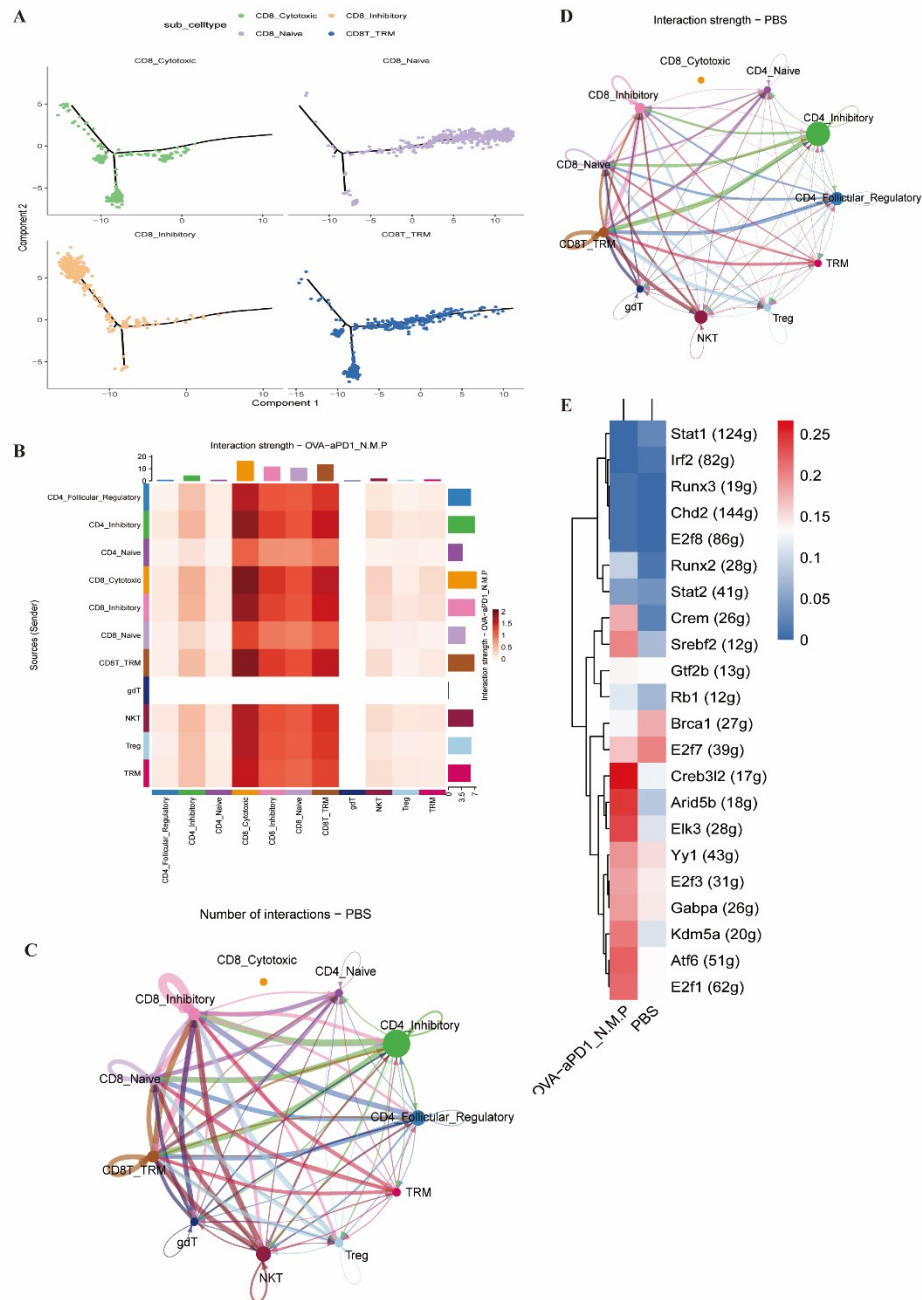

**Figure S5. Liver local T cells communication and Transcriptional features.** (A) Trajectory analysis revealed T cells subsets of liver tissue with distinct differentiation patterns. (B) Graphical comparison of the intercellular communication strength T cells subtypes of OVA-aPD1 N.M.P group. (C, D) The differential number (C) and strength (D) of interactions among T cell subtypes of EMP. N.M.P group. (E) Heatmap displayed the highly expressed marker genes for CD8<sup>+</sup>TRMs.
